# Supplementary material for: Development and Validation of a New Questionnaire assessing Knowledge, Attitudes, and Practices on Pre Pregnancy Care Among Women with Chronic Health Conditions
Source: Research Square preprint supplement (doi:10.21203/rs.3.rs-8015764/v1), 2025-11-28
Supplement: Supplementary file 1 [file 75b319e6ed1de0ddcd0af505.docx]

**Table 1** Preliminary questionnaire

| **Domain** | | **Area covered** | **Response Option** |
| --- | --- | --- | --- |
| A | Knowledge  (49 items) | (1) knowledge about the diseases  (2) disease management  (3) risks to pregnant women  (4) risks to the baby  (5) pre-pregnancy care | Dichotomous:  True, False and Do not know |
| B | Attitudes  (13 items) | Attitude towards PPC including disease optimization, contraception, and healthy lifestyle | 5-point Likert scale:  1 = Strongly Disagree  2 = Disagree  3 = Neutral  4 = Agree  5 = Strongly Agree |
| C | Practices  (12 items) | (1) compliance with follow-up and treatment  (2) lifestyle modification | 5-point Likert scale:  1 = Never  2 = Rarely  3 = Sometimes  4 = Often  5 = Always |

**Table 2** Respondents sociodemographic and clinical characteristics

| **Characteristics** | **EFA and IRT (n=200)** | **CFA (n=200)** |
| --- | --- | --- |
| Age (years)* | 38.90 (7.45)* | 37.84 (7.61)* |
| Ethnicity  Malay  Non-Malay | 185 (92.5)  15 (7.5) | 183 (91.5)  17 (8.5) |
| Marital status  Married  Non-married | 189 (94.5)  11 (5.5) | 183 (91.5)  17 (8.5) |
| Education  Primary school  Secondary school  Degree and higher | 4(2)  140(70)  56 (28) | 5 (2.5)  134 (67))  61 (20.5) |
| Employment  Unemployed  Government  Private  Self-employee | 100(50)  38(19)  26(13)  36(18) | 114 (57)  30 (15)  17 (8.5)  39 (19.5) |
| BMI | 31.34 (5.72)* | 31.81 (5.95)* |
| DM  Yes  No | 61 (30.5)  139 (69.5) | 73 (36.5)  127 (63.5) |
| HPT  Yes  No | 60 (30)  140 (70) | 77 (38.5)  123 (61.5) |
| Obese  Yes  No | 167 (83.5)  33 (16.5) | 167 (83.5)  33 (16.5) |
| IHD  Yes  No | 8 (4)  192 (96) | 4 (2)  196 (98) |

*Mean (SD)

**Table 3** IRT analysis of the knowledge domain (n=200)

| **Factor** | | **Items after removal** | | **b (SE)** | **a (SE)** | | **x2 (df)** | ***p-value*** |
| --- | --- | --- | --- | --- | --- | --- | --- | --- |
| A: Knowledge related to diseases | KA01 | | In Malaysia, a person is considered obese if their Body Mass Index (BMI) is 27.5 kg/m² or higher.  *Di Malaysia, obesiti diklasifikasikan bila seseorang mempunyai Index Jisim Tubuh (BMI) 27.5 kg/m² atau lebih* | -1.30 | 0.86 | | 25.01 (14) | 0.002 |
| KA02 | | Eating processed foods like donuts, sausages, and chocolate every day can increase the chance of becoming obese.  *Mengambil makanan berproses seperti donat, sosej dan coklat setiap hari boleh meningkatkan risiko obesity* | -2.23 | 2.13 | | 12.61 (14) | 0.126 |
| KA03 | | Drinking sugary drinks every day can increase risk of obesity  *Mengambil minuman bergula setiap hari boleh meningkatkan risiko obesiti* | -2.44 | | 1.64 | 14.00 (14) | 0.082 |
| KA04 | | Hypertension usually doesn’t show any signs  *Penyakit darah tinggi selalunya tidak menunjukkan sebarang gejala* | 0.98 | | 0.83 | 18.76 (14) | 0.016 |
| KA05 | | You only find out about hypertension when you check your blood pressure  *Penyakit darah tinggi hanya diketahui apabila pemeriksaan tekanan darah dibuat* | -2.64 | | 0.85 | 8.18 (14) | 0.416 |
| KA06 | | Hypertension is diagnosed if series of blood pressure checks show readings of 140/90 mmHg or more  *Penyakit darah tinggi dikesan apabila beberapa siri pemeriksaan tekanan darah menunjukkan bacaan 140/90 mmHg atau lebih* | -2.53 | | 0.85 | 32.84 (14) | 0.000 |
| KA07 | | Prolonged stress increases the risk of hypertension  *Stres yang berpanjangan meningkatkan risiko penyakit darah tinggi* | -2.14 | | 1.30 | 16.05 (14) | 0.042 |
| KA10 | | Obesity increases the risk of hypertension  *Obesiti meningkatkan risiko tekanan darah tinggi* | -1.47 | | 1.98 | 17.74 (14) | 0.023 |
| KA11 | | Controlled high blood pressure reduces the risk of stroke  *Penyakit darah tinggi yang terkawal mengurangkan risiko strok* | -2.88 | | 0.86 | 10.21 (14) | 0.251 |
| KA12 | | Uncontrolled high blood pressure increases the risk of heart disease  *Penyakit darah tinggi yang tidak terkawal meningkatkan risiko penyakit jantung* | -1.19 | | 2.72 | 14.72 (14) | 0.065 |
| KA13 | | Uncontrolled high blood pressure increases the risk of kidney damage  *Penyakit darah tinggi yang tidak terkawal meningkatkan risiko kerosakan buah pinggang* | -0.78 | | 1.25 | 50.08 (14) | <0.0001 |
| KA14 | | Uncontrolled diabetes causes vision problems  *Penyakit kencing manis yang tidak terkawal menyebabkan masalah penglihatan* | -2.91 | | 1.12 | 9.44 (14) | 0.307 |

**Table 3** Continued

| **Factor** | | | **Items after removal** | | **b (SE)** | **a (SE)** | **x2 (df)** | ***p-value*** |
| --- | --- | --- | --- | --- | --- | --- | --- | --- |
| B: Knowledge related to management and treatment of diseases | KB01 | | | The best treatment for obesity is when it includes a balanced diet and more physical activity  *Rawatan obesiti paling berkesan apabila disertai dengan amalan pemakanan seimbang dan peningkatan aktiviti fizikal* | -2.13 | 30.41 | 0.11 (7) | 1.000 |
| KB02 | | | Long-term use of diabetes medications can damage the kidneys  *Pengambilan ubat kencing manis untuk jangka masa panjang akan merosakkan buah pinggang* | 0.70 | 16.63 | 2.86 (7) | 0.943 |
| KB03 | | | Hypertension patient can stop taking medicine once their blood pressure is under control.  *Pesakit darah tinggi boleh berhenti mengambil ubat apabila tekanan darah sudah terkawal* | 0.30 | 1.21 | 117.89 (7) | <0.0001 |
| KB04 | | | Losing weight can lower the risk of getting diabetes  *Menurunkan berat badan boleh mengurangkankan risiko menghidap kencing manis* | -2.56 | 0.61 | 149.77 (7) | <0.0001 |
| KB06 | | | Reducing salt intake in food will lower the risk of high blood pressure  *Menghadkan pengambilan garam dalam makanan akan mengurangkan risiko tekanan darah tinggi* | -2.51 | 1.30 | 114.11 (7) | <0.0001 |
|  |  | | |  |  |  |  |  |
| C:  Knowledge regarding risks of pregnancy to mother and child | | KC01 | | Pregnant women who are obese have a higher chance of needing a C-section  *Ibu hamil yang obes berisiko lebih tinggi untuk bersalin secara pembedahan.* | -1.14 | 1.88 | 18.48 (7) | 0.018 |
| KC02 | | Obese pregnant women are more likely to develop blood clots in their lungs  *Ibu hamil yang obes berisiko tinggi mengalami darah beku dalam salur darah paru-paru (pulmonary embolism)* | -0.65 | 1.73 | 27.83 (7) | 0.001 |
| KC03 | | Uncontrolled high blood pressure can cause seizures during pregnancy  *Tekanan darah tinggi yang tidak terkawal boleh menyebabkan sawan ketika hamil* | -1.46 | 2.38 | 11.44 (7) | 0.178 |
| KC04 | | Obesity increases the risk of miscarriage  *Obesiti meningkatkan risiko keguguran bayi* | -0.27 | 2.77 | 36.76 (7) | <0.0001 |
| KC05 | | Obese pregnant women are more likely to have babies with birth defects  *Ibu hamil yang obes berisiko lebih tinggi untuk melahirkan bayi yang cacat* | 0.17 | 3.50 | 27.08 (7) | 0.001 |
| KC06 | | Diabetes increases the risk of birth defects in the baby  *Penyakit kencing manis meningkatkan risiko kecacatan bayi dalam kandungan* | -1.13 | 1.59 | 39.36 (7) | <0.0001 |

**Table 3** Continued

| **Factor** | **Items after removal** | | **b (SE)** | **a (SE)** | **x2 (df)** | ***p-value*** |
| --- | --- | --- | --- | --- | --- | --- |
| D:  Knowledge related to pre-pregnancy care | KD01 | Taking folic acid supplements before pregnancy can help prevent birth defects  *Pengambilan suplemen asid folik sebelum hamil boleh membantu mencegah kecacatan bayi* | -1.67 | 2.08 | 6.62 (14) | 0.579 |
| KD02 | Folic acid is recommended to be taken every day starting 3 months before pregnancy until the end of the first trimester  *Asid folik disarankan diambil setiap hari bermula 3 bulan sebelum hamil hingga akhir trimester pertama* | -1.56 | 1.19 | 19.83 (14) | 0.011 |
| KD03 | Some high blood pressure medicines are not safe for pregnant women to take  *Terdapat ubat darah tinggi yang tidak selamat untuk diambil oleh ibu hamil* | -0.62 | 1.44 | 6.58 (14) | 0.582 |
| KD04 | Some diabetes medicines are safe for pregnant women  *Terdapat ubat kencing manis yang selamat diambil oleh ibu hamil* | -1.37 | 1.38 | 9.44 (14) | 0.306 |
| KD05 | Obese women are advised to lose at least 10% of their original weight within 6 months if they plan to get pregnant  *Wanita obes disarankan untuk menurunkan berat badan sekurang-kurangnya 10% daripada berat badan asal dalam tempoh 6 bulan jika merancang untuk hamil* | -0.89 | 1.47 | 13.39 (14) | 0.099 |
| KD06 | For women with diabetes, blood sugar levels (HbA1c) should be less than 6.5% for the 6 months before pregnancy.  *Bagi pesakit kencing manis, bacaan gula darah HbA1c disarankan kurang dari 6.5% dalam tempoh 6 bulan sebelum hamil* | -0.49 | 1.47 | 10.67 (14) | 0.221 |
| KD07 | Insulin injections can be given to women with diabetes before pregnancy if their blood sugar is not under control  *Suntikan insulin boleh diberi kepada pesakit kencing manis sebelum hamil sekiranya gula dalam darah tidak terkawal* | -0.93 | 1.63 | 12.59 (14) | 0.127 |
| KD08 | Family planning methods are recommended if health is not well-managed  *Kaedah perancang keluarga disarankan untuk digunakan jika keadaan kesihatan tidak terkawal* | -1.39 | 2.01 | 11.72 (14) | 0.164 |
| KD10 | Women with diabetes do not need to use family planning because they are infertile  *Pesakit kencing manis tidak perlu menggunakan perancang keluarga kerana tidak subur* | -1.12 | 0.64 | 33.03 (14) | 0.000 |
| KD11 | Birth control pills work well if used regularly as advised  *Pil perancang keluarga adalah kaedah perancang yang berkesan jika diamalkan secara berterusan seperti yang disarankan* | -1.80 | 1.48 | 11.08 (14) | 0.197 |
| KD12 | Implanon (a type of birth control implant) is safe for obese women to use  *Implanon adalah kaedah perancang keluarga yang selamat digunakan oleh wanita obes* | -0.23 | 1.58 | 10.62 (14) | 0.224 |
| KD14 | Intrauterine devices (IUDs) are safe for obese women  *Alat dalam Rahim (IUCD) selamat digunakan untuk wanita obes* | 0.17 | 1.37 | 12.29 (14) | 0.139 |
| Modified parallel analysis supported unidimensionality, RMSEA = 0.01-0.05, M2 = 2.3-76.91, TLI = 0.94-1, CFI = 0.92-1.07, b difficulty, a discrimination, df degree of freedom, IRT item response theory, SE standard error, χ2chi-square, Items with P values < 0.05 in the assessment of the item fit. | | | | | | |

**Table 4** EFA and reliability analysis of attitudes domain (n= 200)

| Items Attitudes on pre-pregnancy care | | Factor loading | Communalities | Cronbach’s alpha |
| --- | --- | --- | --- | --- |
| A01 | I am aware that my health needs to be in good condition before deciding to get pregnant  *Saya sedar bahawa kesihatan saya perlu berada dalam keadaan optimum sebelum membuat keputusan untuk hamil* | 0.532 | 0.283 | 0.885 |
| A02 | I understand that the doctor may need to change my medications if I plan to become pregnant  *Saya memahami bahawa pegawai perubatan mungkin perlu menukar ubat-ubatan saya sekiranya saya bercadang untuk hamil* | 0.612 | 0.375 |
| A03 | I believe that having an ideal body weight is important before planning for pregnancy  *Saya percaya berat badan ideal adalah penting sebelum merancang untuk hamil* | 0.733 | 0.537 |
| A04 | I believe that regular exercise can help me prepare for a healthier pregnancy  *Saya percaya senaman boleh membantu saya bersedia menghadapi kehamilan dengan lebih sihat* | 0.650 | 0.423 |
| A06 | I believe that becoming pregnant when my health is not stable can put me at risk.  *Saya percaya hamil dalam keadaan kesihatan yang tidak stabil boleh memberi risiko kepada saya* | 0.776 | 0.602 |
| A08 | I will seek advice from a doctor before planning to get pregnant  *Saya akan mendapatkan nasihat daripada pegawai perubatan sebelum merancang untuk hamil* | 0.775 | 0.600 |
| A09 | I will practise preconception care for at least six months before planning a pregnancy  *Saya akan mengamalkan penjagaan pra-kehamilan sekurang-kurangnya enam bulan sebelum merancang untuk hamil* | 0.618 | 0.382 |
| A10 | I will follow my doctor’s instructions when taking medications to avoid harmful side effects  *Saya akan mematuhi arahan pegawai perubatan dalam pengambilan ubat-ubatan bagi mengelakkan kesan sampingan yang berbahaya* | 0.831 | 0.690 |
| A11 | I will use family planning methods as advised by my doctor if my health is not well-controlled or not suitable for pregnancy  *Saya akan menggunakan kaedah perancang keluarga mengikut saranan pegawai perubatan jika keadaan kesihatan saya tidak terkawal atau tidak sesuai untuk kehamilan* | 0.666 | 0.443 |

**Table 5** EFA and reliability analysis of practices domain (n= 200)

| Factor | Items: Practices on pre-pregnancy care | | Factor loading | Communalities | Cronbach’s alpha | |
| --- | --- | --- | --- | --- | --- | --- |
| Compliance to treatment | PA1 | I attend my medical appointments for my health conditions as scheduled  *Saya mematuhi temujanji rawatan bagi masalah kesihatan saya seperti diarahkan* | 0.761 | 0.566 | 0.899 | |
| PA2 | I do blood tests and health check-ups based on my doctor’s advice  *Saya menjalani ujian darah dan pemeriksaan berdasarkan nasihat pegawai perubatan* | 0.736 | 0.518 |
| PA3 | I follow my doctor’s instructions when taking my medications  *Saya mengikut arahan pegawai perubatan dalam pengambilan ubat bagi penyakit saya* | 0.844 | 0.704 |
| PA4 | I discuss with my doctor before making any decisions about my treatment  *Saya berbincang dengan pegawai perubatan sebelum membuat sebarang keputusan berkaitan rawatan* | 0.776 | 0.585 |
| PA5 | I follow my doctor’s advice even when I do not have any symptoms  *Saya mengikuti nasihat pegawai perubatan walaupun tidak mengalami sebarang gejala* | 0.627 | 0.385 |
| PA6 | When prescribed medication, I take it according to the instructions provided  *Apabila saya diberi ubat, saya mengambilnya seperti diarahkan oleh pegawai perubatan* | 0.767 | 0.648 |
| PA7 | Before taking my medicine, I make sure I understand the instructions  *Apabila saya mengambil ubat, saya fahamkan arahan terlebih dahulu* | 0.724 | 0.598 |
| Lifestyle modification | PB1 | I do moderate physical activities such as brisk walking, light cycling, or gardening  *Saya melakukan aktiviti fizikal tahap sederhana (seperti berjalan laju, berbasikal ringan atau berkebun)* | 0.158 | 0.025 | | 0.640 |
| PB2 | I eat vegetables or fruits  *Saya makan sayur-sayuran atau buah-buahan* | 0.160 | 0.033 | |
| PB3 | I eat processed foods such as doughnuts, sausages, and chocolate*  *Saya mengambil makanan berproses seperti donat, sosej dan coklat** | 0.622 | 0.370 | |
| PB4 | I eat fatty or oily foods such as fried foods*  *Saya mengambil makanan berlemak atau berminyak seperti makanan bergoreng** | 0.662 | 0.451 | |
| PB5 | I drink sugary drinks such as carbonated or sweetened beverages*  *Saya minum minuman bergula seperti air berkarbonat atau minuman manis** | 0.539 | 0.314 | |

*Negative statements

**Table 6** Summary of fit indices among models for attitudes domain

| Domain | Model | χ2 (df) | *P* | SRMR | RMSEA | 90% CI | CFI | TLI | AIC | BIC |
| --- | --- | --- | --- | --- | --- | --- | --- | --- | --- | --- |
| Attitudes | Model 1 | 43.2 (27) | 0.025 | 0.039 | 0.065 | 0.023, 0.10 | 0.96 | 0.95 | 3475 | 3534 |
| Model 2 | 36.5 (26) | 0.083 | 0.036 | 0.053 | 0.000, 0.091 | 0.98 | 0.97 | 3466 | 3529 |
| Model 3 | 32.8 (25) | 0.137 | 0.033 | 0.046 | 0.000, 0.086 | 0.98 | 0.98 | 3462 | 3528 |
| Model 4 | 27.1 (24) | 0.299 | 0.029 | 0.030 | 0.000, 0.076 | 0.99 | 0.99 | 3456 | 3526 |

Model 1: initial model

Model 2: A03↔ A04, r = 0.252

Model 3: A03↔ A04, r = 0.249; A01 ↔ A07, r = -0.196

Model 4: A03 ↔ A04, r = 0.247; A01 ↔ A07, r = −0.193; A02 ↔ A06, r =−0.239;

(Model 2-4 after correlating the error terms of specific items, with correlated items residual)

**Table 7** Results of the CFA for attitudes domain

| Items Attitudes on pre pregnancy care | | Factor loading (λ) | Reliability  (Raykov’s rho) |
| --- | --- | --- | --- |
| A01 | I am aware that my health needs to be in good condition before deciding to get pregnant  *Saya sedar bahawa kesihatan saya perlu berada dalam keadaan optimum sebelum membuat keputusan untuk hamil* | 0.657 | 0.904 |
| A02 | I understand that the doctor may need to change my medications if I plan to become pregnant  *Saya memahami bahawa pegawai perubatan mungkin perlu menukar ubat-ubatan saya sekiranya saya bercadang untuk hamil* | 0.651 |
| A03 | I believe that having an ideal body weight is important before planning for pregnancy  *Saya percaya berat badan ideal adalah penting sebelum merancang untuk hamil* | 0.732 |
| A04 | I believe that regular exercise can help me prepare for a healthier pregnancy  *Saya percaya senaman boleh membantu saya bersedia menghadapi kehamilan dengan lebih sihat* | 0.660 |
| A05 | I believe that becoming pregnant when my health is not stable can put me at risk.  *Saya percaya hamil dalam keadaan kesihatan yang tidak stabil boleh memberi risiko kepada saya* | 0.615 |
| A06 | I will seek advice from a doctor before planning to get pregnant  *Saya akan mendapatkan nasihat daripada pegawai perubatan sebelum merancang untuk hamil* | 0.808 |
| A07 | I will practise preconception care for at least six months before planning a pregnancy  *Saya akan mengamalkan penjagaan pra-kehamilan sekurang-kurangnya enam bulan sebelum merancang untuk hamil* | 0.700 |
| A08 | I will follow my doctor’s instructions when taking medications to avoid harmful side effects  *Saya akan mematuhi arahan pegawai perubatan dalam pengambilan ubat-ubatan bagi mengelakkan kesan sampingan yang berbahaya* | 0.831 |
| A09 | I will use family planning methods as advised by my doctor if my health is not well-controlled or not suitable for pregnancy  *Saya akan menggunakan kaedah perancang keluarga mengikut saranan pegawai perubatan jika keadaan kesihatan saya tidak terkawal atau tidak sesuai untuk kehamilan* | 0.725 |

**Table 8** Summary of fit indices among models for practices domain

| Domain | Model | χ2 (df) | *P* | SRMR | | RMSEA | 90% CI | CFI | TLI | | AIC | | BIC |
| --- | --- | --- | --- | --- | --- | --- | --- | --- | --- | --- | --- | --- | --- |
| Practices | Model 1 |  | No fit indices were generated | | | | | | | | | | |
| Model 2 | 90.7 (34) | <0.001 | | 0.07 | 0.108 | 0.082, 0.135 | 0.86 | | 0.82 | | 4723 | 4792 |
| Model 3 | 71.9 (33) | <0.001 | | 0.06 | 0.09 | 0.063, 0.121 | 0.90 | | 0.87 | | 4701 | 4773 |
| Model 4 | 59 (32) | 0.002 | | 0.06 | 0.076 | 0.045, 0.106 | 0.93 | | 0.91 | | 4680 | 4756 |
| Model 5 | 50 (31) | 0.018 | | 0.053 | 0.064 | 0.027, 0.095 | 0.95 | | 0.93 | | 4669 | 4748 |

Model 1: initial model

Model 2: after removed items PB1 and PB2

Model 3: PA6↔ PA7, r = 0.477

Model 4: PA6↔ PA7, r = 0.369; PA2↔ PA4, r = 0.378

Model 5: PA6↔ PA7, r = 0.366; PA2↔ PA4, r = 0.376; PA4↔ PA5, r =0.241

(Model 3-5 after correlating the error terms of specific items, with correlated items residual

**Table 9** Results of the CFA for practices domain

| Factor | Item Practices on pre pregnancy care | | Factor loading (λ) | Reliability (Raykov’s rho) |
| --- | --- | --- | --- | --- |
| Compliance to treatment | PA1 | I attend my medical appointments for my health conditions as scheduled  *Saya mematuhi temujanji rawatan bagi masalah kesihatan saya seperti diarahkan* | 0.627 | 0.8 |
| PA2 | I do blood tests and health check-ups based on my doctor’s advice  *Saya menjalani ujian darah dan pemeriksaan berdasarkan nasihat pegawai perubatan* | 0.636 |
| PA3 | I follow my doctor’s instructions when taking my medications  *Saya mengikut arahan pegawai perubatan dalam pengambilan ubat bagi penyakit saya* | 0.831 |
| PA4 | I discuss with my doctor before making any decisions about my treatment  *Saya berbincang dengan pegawai perubatan sebelum membuat sebarang keputusan berkaitan rawatan* | 0.594 |
| PA5 | I follow my doctor’s advice even when I do not have any symptoms  *Saya mengikuti nasihat pegawai perubatan walaupun tidak mengalami sebarang gejala* | 0.512 |
| PA6 | When prescribed medication, I take it according to the instructions provided  *Apabila saya diberi ubat, saya mengambilnya seperti diarahkan oleh pegawai perubatan* | 0.853 |
| PA7 | Before taking my medicine, I make sure I understand the instructions  *Apabila saya mengambil ubat, saya fahamkan arahan terlebih dahulu* | 0.759 |
| Dietary practices | PB3 | I eat processed foods such as doughnuts, sausages, and chocolate*  *Saya mengambil makanan berproses seperti donat, sosej dan coklat** | 0.564 | 0.7 |
| PB4 | I eat fatty or oily foods such as fried foods*  *Saya mengambil makanan berlemak atau berminyak seperti makanan bergoreng** | 0.762 |
| PB5 | I drink sugary drinks such as carbonated or sweetened beverages*  *Saya minum minuman bergula seperti air berkarbonat atau minuman manis** | 0.624 |

*Negative statements

**
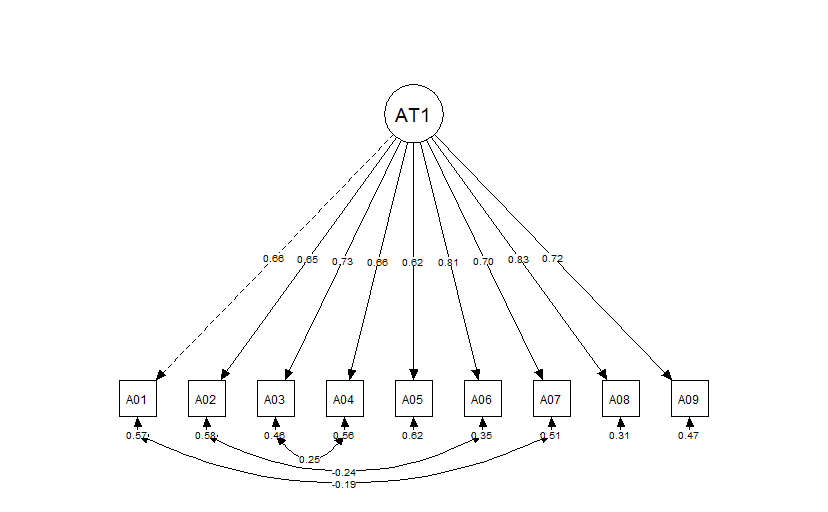
**
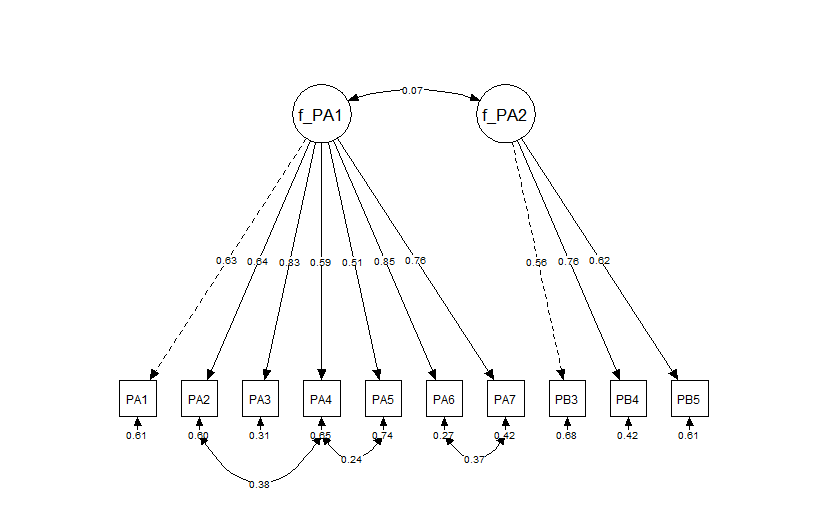


**Figure 1** Plot Diagram for the Attitudes Domain **Figure 2** Plot Diagram for the Practices Domain
